# Supplementary material for: International Trends in Lithium Use for Pharmacotherapy and Clinical Correlates in Bipolar Disorder: A Scoping Review
Source: MDPI journal article supplement (doi:10.3390/brainsci14010102), 2024-01-20
Supplement: s1 [file s1]

**Supplementary Table S1. Search Strategy.**

| Search Number | Search String                                                                                                                                                                                                                                                                                                                    |
|---------------|----------------------------------------------------------------------------------------------------------------------------------------------------------------------------------------------------------------------------------------------------------------------------------------------------------------------------------|
| 1             | Bipolar Disorder/                                                                                                                                                                                                                                                                                                                |
| 2             | (Affective Psychosis, Bipolar or Bipolar Disorder Type 1 or Bipolar Disorder Type 2 or Bipolar Mood Disorder or Depression, Bipolar or Manic Depression or Manic Disorder or Manic-Depressive Psychosis or Psychoses, Manic-Depressive or Psychosis, Manic-Depressive or Type 1 Bipolar Disorder or Type 2 Bipolar Disorder).mp. |
| 3             | 1 or 2                                                                                                                                                                                                                                                                                                                           |
| 4             | Lithium.mp. or Lithium Carbonate/or Lithium/or Lithium Compounds/or Lithium Chloride/                                                                                                                                                                                                                                            |
| 5             | Mood stabili*.mp.                                                                                                                                                                                                                                                                                                                |
| 6             | 4 or 5                                                                                                                                                                                                                                                                                                                           |
| 7             | Pharmacoepidemiology.mp. or Pharmacoepidemiology/                                                                                                                                                                                                                                                                                |
| 8             | Epidemiology.mp. or Epidemiology/                                                                                                                                                                                                                                                                                                |
| 9             | Epidemiologic Studies.mp. or Epidemiologic Studies/                                                                                                                                                                                                                                                                              |
| 10            | Epidemiological Monitoring.mp. or Epidemiological Monitoring/                                                                                                                                                                                                                                                                    |
| 11            | Drug Utilization/or Drug Prescriptions/or prescription pattern*.mp.                                                                                                                                                                                                                                                              |
| 12            | 7 or 8 or 9 or 10 or 11                                                                                                                                                                                                                                                                                                          |
| 13            | 3 and 6 and 12                                                                                                                                                                                                                                                                                                                   |
| 14            | limit 13 to english language                                                                                                                                                                                                                                                                                                     |
